# Supplementary material for: Development, Implementation and Assessment of Molecular Diagnostics by Next Generation Sequencing in Personalized Treatment of Cancer: Experience of a Public Reference Healthcare Hospital
Source: PubMed Central journal article supplement (PMC6721584; doi:10.3390/cancers11081196), 2019-08-16
Supplement: cancers-11-01196-s001.pdf [file cancers-11-01196-s001.pdf]

## Supplementary Materials: Development Implementation and Assessment of Molecular Diagnostics by Next Generation Sequencing in Personalized Treatment of Cancer: Experience of a Public Reference Healthcare Hospital.

Javier Simarro, Rosa Murria, Gema, Pérez-Simó, Marta Llop, Nuria Mancheño, David Ramos, Inmaculada de Juan, Eva Barragán, Begoña Laiz, Enrique Cases, Emilio Ansótegui, José Gómez-Codina, Jorge Aparicio, Carmen Salvador, Óscar Juan and Sarai Palanca

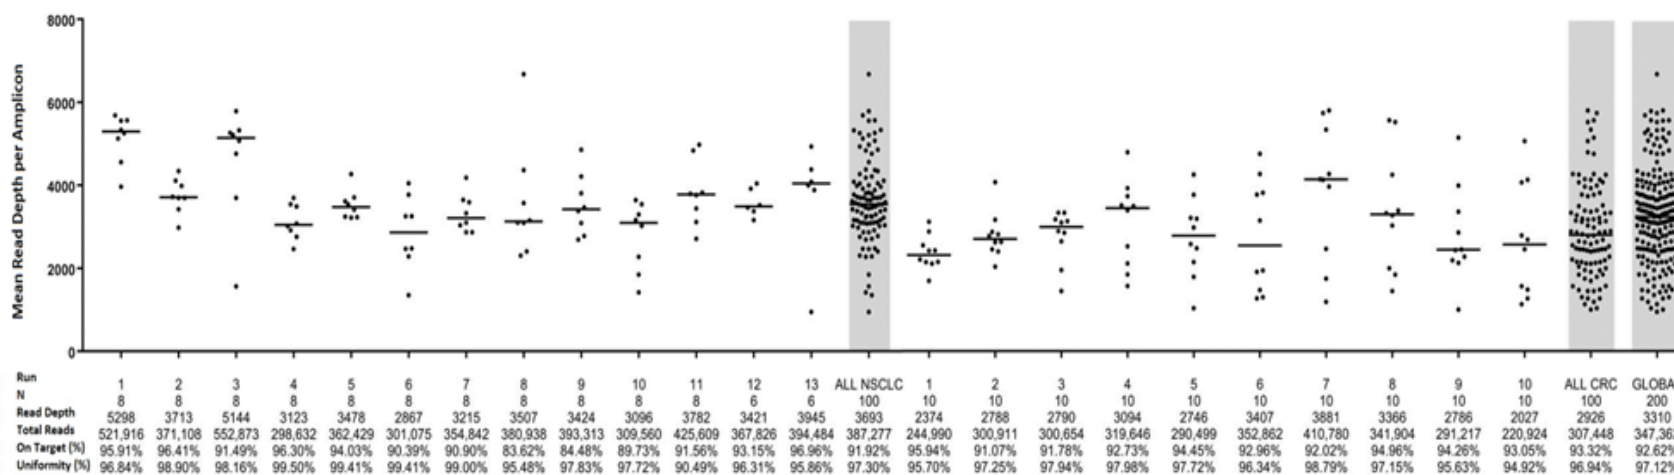

**Figure S1.** NGS quality metrics. N- Number of samples analyzed per run; Read Depth- Represents the mean value of reads of each amplicon; Total Reads-Represent mean total reads per samples; "On target"-Represents the mean % of reads over the sequences of interest; Uniformity-Represents the mean % of uniformity coverage.

Table S1. Pathogenic variants detected in NSCLC patients.

| Patient | Chr Position   | Gene          | NG/NM       | Fusion     | Mutation Type          | Exon  | Amino Acid Change       | CDS                   | Total Coverage | Variant Coverage | VAF  |
|---------|----------------|---------------|-------------|------------|------------------------|-------|-------------------------|-----------------------|----------------|------------------|------|
| NSCLC1  | chr3:178952090 | <i>PIK3CA</i> | NM_006218.2 |            | missense               | 21    | p.Gly1049Arg            | c.3145G>C             | 3995           | 773              | 19 % |
|         | chr7:55259515  | <i>EGFR</i>   | NM_005228.3 |            | missense               | 21    | p.Leu858Arg             | c.2573T>G             | 3959           | 800              | 20 % |
| NSCLC2  | chr7:55242462  | <i>EGFR</i>   | NM_005228.3 |            | nonframeshift deletion | 19    | p.Glu746_Thr751delinsVA | c.2237_2253delinsTGCT | 3996           | 2318             | 58 % |
| NSCLC3  | chr7:55242464  | <i>EGFR</i>   | NM_005228.3 |            | nonframeshift deletion | 19    | p.Glu746_Ala750del      | c.2235_2249del        | 3535           | 107              | 3 %  |
| NSCLC4  | chr7:55259515  | <i>EGFR</i>   | NM_005228.3 |            | missense               | 21    | p.Leu858Arg             | c.2573T>G             | 3523           | 390              | 11 % |
| NSCLC5  | chr3:178952085 | <i>PIK3CA</i> | NM_006218.2 |            | missense               | 21    | p.His1047Leu            | c.3140A>T             | 3994           | 3052             | 76 % |
|         | chr17:7578190  | <i>TP53</i>   | NM_000546.5 |            | missense               | 6     | p.Tyr220Cys             | c.659A>G              | 3999           | 2653             | 66 % |
| NSCLC7  | chr2:42522656  | <i>ALK</i>    | NG_009445.1 | EML4 - ALK |                        | 6 20  |                         |                       |                |                  | -    |
| NSCLC8  | chr17:7577094  | <i>TP53</i>   | NM_000546.5 |            | missense               | 8     | p.Arg282Trp             | c.844C>T              | 1396           | 237              | 17 % |
| NSCLC9  | chr12:25398284 | <i>KRAS</i>   | NM_033360.3 |            | missense               | 2     | p.Gly12Val              | c.35G>T               | 3993           | 1375             | 34 % |
|         | chr17:7578442  | <i>TP53</i>   | NM_000546.5 |            | missense               | 5     | p.Tyr163Cys             | c.488A>G              | 1128           | 668              | 59 % |
| NSCLC10 | chr17:7578457  | <i>TP53</i>   | NM_000546.5 |            | missense               | 5     | p.Arg158Pro             | c.473G>C              | 1657           | 1365             | 82 % |
| NSCLC11 | chr12:25380275 | <i>KRAS</i>   | NM_033360.3 |            | missense               | 3     | p.Gln61His              | c.183A>T              | 3996           | 1568             | 39 % |
| NSCLC12 | chr12:25398285 | <i>KRAS</i>   | NM_033360.3 |            | missense               | 2     | p.Gly12Cys              | c.34G>T               | 3329           | 788              | 24 % |
| NSCLC13 | chr12:25398284 | <i>KRAS</i>   | NM_033360.3 |            | missense               | 2     | p.Gly12Asp              | c.35G>A               | 3996           | 1738             | 43 % |
|         | chr17:7578530  | <i>TP53</i>   | NM_000546.5 |            | missense               | 5     | p.Phe134Val             | c.400T>G              | 2745           | 743              | 27 % |
| NSCLC14 | chr17:7577534  | <i>TP53</i>   | NM_000546.5 |            | missense               | 7     | p.Arg249Ser             | c.747G>T              | 3215           | 535              | 17 % |
|         | chr17:7578406  | <i>TP53</i>   | NM_000546.5 |            | missense               | 5     | p.Arg175Leu             | c.524G>T              | 2127           | 211              | 10 % |
| NSCLC15 | chr12:25398281 | <i>KRAS</i>   | NM_033360.3 |            | missense               | 2     | p.Gly13Asp              | c.38G>A               | 3998           | 1275             | 32 % |
|         | chr17:7578468  | <i>TP53</i>   | NM_000546.5 |            | frameshift deletion    | 5     | p.Gly154fs              | c.461_461del          | 1119           | 228              | 20 % |
| NSCLC16 | chr2:42522656  | <i>ALK</i>    | NG_009445.1 | EML4 - ALK |                        | 6 20  |                         |                       |                |                  | -    |
| NSCLC17 | chr3:41266113  | <i>CTNNB1</i> | NM_001904.3 |            | missense               | 3     | p.Ser37Cys              | c.110C>G              | 1781           | 298              | 17 % |
|         | chr7:55241677  | <i>EGFR</i>   | NM_005228.3 |            | missense               | 18    | p.Glu709Lys             | c.2125G>A             | 2721           | 1101             | 40 % |
| NSCLC18 | chr7:55241707  | <i>EGFR</i>   | NM_005228.3 |            | missense               | 18    | p.Gly719Cys             | c.2155G>T             | 2709           | 1100             | 41 % |
|         | chr17:7577535  | <i>TP53</i>   | NM_000546.5 |            | missense               | 7     | p.Arg249Thr             | c.746G>C              | 3997           | 1583             | 40 % |
| NSCLC19 | chr7:55259515  | <i>EGFR</i>   | NM_005228.3 |            | missense               | 21    | p.Leu858Arg             | c.2573T>G             | 3637           | 248              | 7 %  |
|         | chr17:7578269  | <i>TP53</i>   | NM_000546.5 |            | missense               | 6     | p.Leu194Phe             | c.580C>T              | 2652           | 228              | 9 %  |
| NSCLC20 | chr12:25398281 | <i>KRAS</i>   | NM_033360.3 |            | missense               | 2     | p.Gly13Asp              | c.38G>A               | 3513           | 599              | 17 % |
|         | chr17:7578461  | <i>TP53</i>   | NM_000546.5 |            | missense               | 5     | p.Val157Phe             | c.469G>T              | 3379           | 849              | 25 % |
| NSCLC22 | chr6:117645578 | <i>ROS1</i>   | NG_033929.1 | EZR - ROS1 |                        | 10 34 |                         |                       |                |                  | -    |
| NSCLC23 | chr7:140453136 | <i>BRAF</i>   | NM_004333.4 |            | missense               | 15    | p.Val600Glu             | c.1799T>A             | 3997           | 128              | 3 %  |
| NSCLC24 | chr7:140453136 | <i>BRAF</i>   | NM_004333.4 |            | missense               | 15    | p.Val600Glu             | c.1799T>A             | 3993           | 205              | 5 %  |
|         | chr12:25380275 | <i>KRAS</i>   | NM_033360.3 |            | missense               | 3     | p.Gln61His              | c.183A>C              | 3996           | 525              | 13 % |
| NSCLC25 | chr12:25398285 | <i>KRAS</i>   | NM_033360.3 |            | missense               | 2     | p.Gly12Cys              | c.34G>T               | 3994           | 248              | 6 %  |
|         | chr12:25398284 | <i>KRAS</i>   | NM_033360.3 |            | missense               | 2     | p.Gly12Val              | c.35G>T               | 3988           | 305              | 8 %  |
| NSCLC26 | chr17:7578535  | <i>TP53</i>   | NM_000546.5 |            | missense               | 5     | p.Lys132Arg             | c.395A>G              | 3098           | 176              | 6 %  |
|         | chr12:25398284 | <i>KRAS</i>   | NM_033360.3 |            | missense               | 2     | p.Gly12Val              | c.35G>T               | 3880           | 504              | 13 % |
| NSCLC28 | chr7:140481402 | <i>BRAF</i>   | NM_004333.4 |            | missense               | 11    | p.Gly469Val             | c.1406G>T             | 3956           | 1038             | 26 % |
| NSCLC29 | chr17:7577538  | <i>TP53</i>   | NM_000546.5 |            | missense               | 7     | p.Arg248Leu             | c.743G>T              | 3958           | 669              | 17 % |
| NSCLC30 | chr12:25398285 | <i>KRAS</i>   | NM_033360.3 |            | missense               | 2     | p.Gly12Cys              | c.34G>T               | 2386           | 357              | 15 % |
| NSCLC31 | chr12:25398284 | <i>KRAS</i>   | NM_033360.3 |            | missense               | 2     | p.Gly12Val              | c.35G>T               | 2688           | 738              | 27 % |
|         | chr17:7577538  | <i>TP53</i>   | NM_000546.5 |            | missense               | 7     | p.Arg248Leu             | c.743G>T              | 3878           | 629              | 16 % |

|         |                |               |             |          |                        |       |                        |                     |      |      |      |
|---------|----------------|---------------|-------------|----------|------------------------|-------|------------------------|---------------------|------|------|------|
|         | chr19:1221313  | <i>STK11</i>  | NM_000455.4 |          | frameshift deletion    | 6     | p.Pro281fs             | c.837_837del        | 1984 | 567  | 29 % |
| NSCLC32 | chr12:25398284 | <i>KRAS</i>   | NM_033360.3 |          | missense               | 2     | p.Gly12Val             | c.35G>T             | 3905 | 976  | 25 % |
| NSCLC33 | chr17:7578469  | <i>TP53</i>   | NM_000546.5 |          | missense               | 5     | p.Gly154Val            | c.461G>T            | 1336 | 469  | 35 % |
| NSCLC34 | chr17:7574003  | <i>TP53</i>   | NM_000546.5 |          | nonsense               | 10    | p.Arg342Ter            | c.1024C>T           | 3695 | 763  | 21 % |
|         | chr17:7577114  | <i>TP53</i>   | NM_000546.5 |          | frameshift insertion   | 8     | p.Cys275fs             | c.823_824insT       | 2190 | 87   | 4 %  |
| NSCLC35 | chr12:25398285 | <i>KRAS</i>   | NM_033360.3 |          | missense               | 2     | p.Gly12Cys             | c.34G>T             | 3999 | 2387 | 60 % |
|         | chr17:7577120  | <i>TP53</i>   | NM_000546.5 |          | missense               | 8     | p.Arg273Leu            | c.818G>T            | 1726 | 900  | 52 % |
| NSCLC36 | chr17:7578403  | <i>TP53</i>   | NM_000546.5 |          | missense               | 5     | p.Cys176Tyr            | c.527G>A            | 2573 | 1840 | 72 % |
| NSCLC38 | chr12:25398285 | <i>KRAS</i>   | NM_033360.3 |          | missense               | 2     | p.Gly12Cys             | c.34G>T             | 2941 | 254  | 9 %  |
| NSCLC39 | chr3:41266134  | <i>CTNNB1</i> | NM_001904.3 |          | missense               | 3     | p.Pro44Leu             | c.131C>T            | 2260 | 789  | 35 % |
|         | chr3:178936091 | <i>PIK3CA</i> | NM_006218.2 |          | missense               | 10    | p.Glu545Lys            | c.1633G>A           | 3887 | 550  | 14 % |
| NSCLC40 | chr17:7579355  | <i>TP53</i>   | NM_000546.5 |          | missense               | 4     | p.Leu111Arg            | c.332T>G            | 2014 | 785  | 39 % |
|         | chr7:140453134 | <i>BRAF</i>   | NM_004333.4 |          | missense               | 15    | p.Lys601Glu            | c.1801A>G           | 1452 | 397  | 27 % |
| NSCLC41 | chr17:7577046  | <i>TP53</i>   | NM_000546.5 |          | nonsense               | 8     | p.Glu298Ter            | c.892G>T            | 1550 | 145  | 9 %  |
| NSCLC42 | chr17:7579358  | <i>TP53</i>   | NM_000546.5 |          | missense               | 4     | p.Arg110Leu            | c.329G>T            | 552  | 130  | 24 % |
| NSCLC43 | chr12:25398284 | <i>KRAS</i>   | NM_033360.3 |          | missense               | 2     | p.Gly12Val             | c.35G>T             | 2833 | 170  | 6 %  |
| NSCLC44 | chr17:7578526  | <i>TP53</i>   | NM_000546.5 |          | missense               | 5     | p.Cys135Tyr            | c.404G>A            | 1405 | 638  | 45 % |
| NSCLC45 | chr17:7578208  | <i>TP53</i>   | NM_000546.5 |          | missense               | 6     | p.His214Arg            | c.641A>G            | 3215 | 1476 | 46 % |
| NSCLC46 | chr12:25398284 | <i>KRAS</i>   | NM_033360.3 |          | missense               | 2     | p.Gly12Val             | c.35G>T             | 3996 | 896  | 22 % |
| NSCLC48 | chr3:178936082 | <i>PIK3CA</i> | NM_006218.2 |          | missense               | 10    | p.Glu542Gln            | c.1624G>C           | 3664 | 282  | 8 %  |
|         | chr17:7578461  | <i>TP53</i>   | NM_000546.5 |          | missense               | 5     | p.Val157Phe            | c.469G>T            | 2290 | 225  | 10 % |
| NSCLC49 | chr17:7578395  | <i>TP53</i>   | NM_000546.5 |          | missense               | 5     | p.His179Tyr            | c.535C>T            | 3965 | 845  | 21 % |
| NSCLC50 | chr12:25398285 | <i>KRAS</i>   | NM_033360.3 |          | missense               | 2     | p.Gly12Cys             | c.34G>T             | 3991 | 1456 | 36 % |
|         | chr17:7577528  | <i>TP53</i>   | NM_000546.5 |          | nonframeshift deletion | 7     | p.Arg249del            | c.745_747delAGG     | 3912 | 1240 | 32 % |
| NSCLC51 | chr12:25398285 | <i>KRAS</i>   | NM_033360.3 |          | missense               | 2     | p.Gly12Cys             | c.34G>T             | 3728 | 888  | 24 % |
|         | chr17:7578517  | <i>TP53</i>   | NM_000546.5 |          | missense               | 5     | p.Ala138Val            | c.413C>T            | 2464 | 486  | 20 % |
| NSCLC52 | chr7:140453154 | <i>BRAF</i>   | NM_004333.4 |          | missense               | 15    | p.Asp594Val            | c.1781A>T           | 1493 | 64   | 4 %  |
|         | chr12:25398281 | <i>KRAS</i>   | NM_033360.3 |          | missense               | 2     | p.Gly13Asp             | c.38G>A             | 1946 | 98   | 5 %  |
| NSCLC53 | chr10:89717712 | <i>PTEN</i>   | NM_000314.4 |          | missense               | 7     | p.Pro246Leu            | c.737C>T            | 3977 | 422  | 11 % |
|         | chr17:37880981 | <i>ERBB2</i>  | NM_004448.3 |          | duplication            | 20    | p.Ala771_Met774dup     | c.2311_2322dup      | 2146 | 556  | 26 % |
| NSCLC55 | chr17:7577022  | <i>TP53</i>   | NM_000546.5 |          | nonsense               | 8     | p.Arg306Ter            | c.916C>T            | 1091 | 300  | 28 % |
| NSCLC56 | chr4:153247289 | <i>FBXW7</i>  | NM_033632.3 |          | missense               | 10    | p.Arg505Ser            | c.1513C>A           | 3996 | 121  | 3 %  |
| NSCLC57 | chr7:55242478  | <i>EGFR</i>   | NM_005228.3 |          | frameshift deletion    |       | p.Glu747_Ala750delinsP | c.2238_2248delinsGC | 3559 | 172  | 5 %  |
|         | chr12:25398285 | <i>KRAS</i>   | NM_033360.3 |          | missense               | 2     | p.Gly12Cys             | c.34G>T             | 3438 | 2740 | 80 % |
| NSCLC58 | chr7:140481411 | <i>BRAF</i>   | NM_004333.4 |          | missense               | 11    | p.Gly466Val            | c.1397G>T           | 2459 | 453  | 18 % |
|         | chr17:7579882  | <i>TP53</i>   | NM_000546.5 |          | nonsense               | 2     | p.Glu11Ter             | c.31G>T             | 3442 | 630  | 18 % |
| NSCLC59 | chr7:55242468  | <i>EGFR</i>   | NM_005228.3 |          | nonframeshift deletion | 19    | p.Glu746_Arg748del     | c.2236_2244del      | 1647 | 1101 | 67 % |
|         | chr17:7577105  | <i>TP53</i>   | NM_000546.5 |          | missense               | 8     | p.Pro278Arg            | c.833C>G            | 524  | 84   | 16 % |
| NSCLC60 | chr2:42522656  | <i>ALK</i>    | NG_009445.1 | EML4 ALK |                        | 13 20 |                        |                     |      |      | -    |
| NSCLC61 | chr7:140453136 | <i>BRAF</i>   | NM_004333.4 |          | missense               | 15    | p.Val600Glu            | c.1799T>A           | 3920 | 227  | 6 %  |
|         | chr17:7577517  | <i>TP53</i>   | NM_000546.5 |          | missense               | 7     | p.Ile255Asn            | c.764T>A            | 1850 | 104  | 6 %  |
| NSCLC64 | chr1:115256529 | <i>NRAS</i>   | NM_002524.4 |          | missense               | 3     | p.Gln61Leu             | c.182A>T            | 3987 | 500  | 13 % |
|         | chr17:7577035  | <i>TP53</i>   | NM_000546.5 |          | frameshift deletion    | 8     | p.Pro301fs             | c.902_902delC       | 1416 | 89   | 6 %  |
| NSCLC65 | chr3:178952146 | <i>PIK3CA</i> | NM_006218.2 |          | missense               | 21    | p.Leu1067Phe           | c.3201G>C           | 3997 | 365  | 9 %  |
|         | chr4:153249460 | <i>FBXW7</i>  | NM_033632.3 |          | missense               | 9     | p.Asp440His            | c.1318G>C           | 3996 | 263  | 7 %  |
|         | chr7:140481411 | <i>BRAF</i>   | NM_004333.4 |          | missense               | 11    | p.Gly466Ala            | c.1397G>C           | 2599 | 651  | 25 % |

|          |                |        |             |            |                        |      |                    |                 |      |      |      |
|----------|----------------|--------|-------------|------------|------------------------|------|--------------------|-----------------|------|------|------|
|          | chr17:7578441  | TP53   | NM_000546.5 |            | nonsense               | 5    | p.Tyr163Ter        | c.489C>A        | 1795 | 444  | 25 % |
| NSCLC66  | chr2:42522656  | ALK    | NG_009445.1 | EML4 - ALK |                        | 6120 |                    |                 |      |      | -    |
| NSCLC67  | chr17:7578452  | TP53   | NM_000546.5 |            | frameshift deletion    | 5    | p.Met160fs         | c.477_477delC   | 3261 | 579  | 18 % |
| NSCLC68  | chr7:55259515  | EGFR   | NM_005228.3 |            | missense               | 21   | p.Leu858Arg        | c.2573T>G       | 3973 | 113  | 3 %  |
|          | chr17:7578430  | TP53   | NM_000546.5 |            | frameshift deletion    | 5    | p.Gln167fs         | c.499_499delC   | 3289 | 170  | 5 %  |
| NSCLC69  | chr17:7578280  | TP53   | NM_000546.5 |            | missense               | 6    | p.Pro190Leu        | c.569C>T        | 1334 | 114  | 9 %  |
| NSCLC70  | chr12:25398280 | KRAS   | NM_033360.3 |            | missense               | 2    | p.Gly13Glu         | c.38_39delinsAA | 3982 | 1797 | 45 % |
| NSCLC71  | chr17:7577099  | TP53   | NM_000546.5 |            | missense               | 8    | p.Arg280Thr        | c.839G>C        | 1332 | 461  | 35 % |
| NSCLC72  | chr17:7577539  | TP53   | NM_000546.5 |            | missense               | 7    | p.Arg248Trp        | c.742C>T        | 1676 | 616  | 37 % |
| NSCLC73  | chr17:7577108  | TP53   | NM_000546.5 |            | missense               | 8    | p.Cys277Phe        | c.830G>T        | 1465 | 473  | 32 % |
| NSCLC74  | chr7:55259515  | EGFR   | NM_005228.3 |            | missense               | 21   | p.Leu858Arg        | c.2573T>G       | 523  | 167  | 32 % |
| NSCLC75  | chr12:25398285 | KRAS   | NM_033360.3 |            | missense               | 2    | p.Gly12Cys         | c.34G>T         | 3998 | 641  | 16 % |
| NSCLC76  | chr12:25398285 | KRAS   | NM_033360.3 |            | missense               | 2    | p.Gly12Cys         | c.34G>T         | 3994 | 2031 | 51 % |
|          | chr17:7577534  | TP53   | NM_000546.5 |            | missense               | 7    | p.Arg249Ser        | c.747G>C        | 1786 | 642  | 36 % |
| NSCLC78  | chr12:25380285 | KRAS   | NM_033360.3 |            | missense               | 3    | p.Thr58Ile         | c.173C>T        | 4000 | 98   | 2 %  |
|          | chr12:25398285 | KRAS   | NM_033360.3 |            | missense               | 2    | p.Gly12Cys         | c.34G>T         | 3994 | 1132 | 28 % |
| NSCLC79  | chr7:140481411 | BRAF   | NM_004333.4 |            | missense               | 11   | p.Gly466Val        | c.1397G>T       | 3999 | 1994 | 50 % |
|          | chr17:7577103  | TP53   | NM_000546.5 |            | frameshift insertion   | 8    | p.Gly279fs         | c.834_835insT   | 2670 | 1151 | 43 % |
| NSCLC80  | chr2:212578301 | ERBB4  | NM_005235.2 |            | missense               | 8    | p.Gly319Val        | c.956G>T        | 2793 | 1008 | 36 % |
|          | chr17:7578457  | TP53   | NM_000546.5 |            | missense               | 5    | p.Arg158Leu        | c.473G>T        | 1036 | 784  | 76 % |
| NSCLC81  | chr17:37880981 | ERBB2  | NM_004448.3 |            | duplication            | 20   | p.Ala771_Met774dup | c.2311_2322dup  | 1467 | 200  | 14 % |
| NSCLC82  | chr7:140481411 | BRAF   | NM_004333.4 |            | missense               | 11   | p.Gly466Val        | c.1397G>T       | 3993 | 343  | 9 %  |
|          | chr17:7578442  | TP53   | NM_000546.5 |            | missense               | 5    | p.Tyr163Cys        | c.488A>G        | 3860 | 238  | 6 %  |
| NSCLC83  | chr12:25398285 | KRAS   | NM_033360.3 |            | missense               | 2    | p.Gly12Arg         | c.34G>C         | 3993 | 777  | 19 % |
| NSCLC84  | chr17:7578469  | TP53   | NM_000546.5 |            | missense               | 5    | p.Gly154Val        | c.461G>T        | 1480 | 351  | 24 % |
| NSCLC85  | chr17:7578392  | TP53   | NM_000546.5 |            | nonsense               | 5    | p.Glu180Ter        | c.538G>T        | 1666 | 534  | 32 % |
|          | chr19:1220487  | STK11  | NM_000455.4 |            | missense               | 4    | p.Asp194Tyr        | c.580G>T        | 749  | 209  | 28 % |
| NSCLC86  | chr17:7577090  | TP53   | NM_000546.5 |            | missense               | 8    | p.Arg283Pro        | c.848G>C        | 1148 | 51   | 4 %  |
| NSCLC87  | chr17:7578431  | TP53   | NM_000546.5 |            | nonsense               | 5    | p.Gln167Ter        | c.499C>T        | 1896 | 880  | 46 % |
| NSCLC88  | chr3:41266098  | CTNNB1 | NM_001904.3 |            | missense               | 3    | p.Asp32Val         | c.95A>T         | 513  | 20   | 4 %  |
|          | chr7:140453155 | BRAF   | NM_004333.4 |            | missense               | 15   | p.Asp594Asn        | c.1780G>A       | 798  | 187  | 23 % |
| NSCLC89  | chr3:178936082 | PIK3CA | NM_006218.2 |            | missense               | 10   | p.Glu542Lys        | c.1624 G>A      | 710  | 16   | 2 %  |
|          | chr7:55242464  | EGFR   | NM_005228.3 |            | nonframeshift deletion | 19   | p.Glu746_Ala750del | c.2235_2249del  | 1283 | 242  | 19 % |
| NSCLC90  | chr12:25398284 | KRAS   | NM_033360.3 |            | missense               | 2    | p.Gly12Val         | c.35G>T         | 3993 | 589  | 15 % |
| NSCLC91  | chr12:25398285 | KRAS   | NM_033360.3 |            | missense               | 2    | p.Gly12Cys         | c.34G>T         | 3996 | 157  | 4 %  |
|          | chr17:37881022 | ERBB2  | NM_004448.3 |            | missense               | 20   | p.Arg784His        | c.2351G>A       | 4000 | 147  | 4 %  |
| NSCLC92  | chr7:55259515  | EGFR   | NM_005228.3 |            | missense               | 21   | p.Leu858Arg        | c.2573T>G       | 3989 | 409  | 10 % |
|          | chr17:7578469  | TP53   | NM_000546.5 |            | missense               | 5    | p.Gly154Val        | c.461G>T        | 2903 | 199  | 7 %  |
| NSCLC93  | chr7:55248998  | EGFR   | NM_005228.3 |            | duplication            | 20   | p.Ala767_Val769dup | c.2300_2308dup  | 2758 | 1009 | 37 % |
| NSCLC94  | chr12:25380276 | KRAS   | NM_033360.3 |            | missense               | 3    | p.Gln61Leu         | c.182A>T        | 3998 | 535  | 13 % |
| NSCLC96  | chr12:25398285 | KRAS   | NM_033360.3 |            | missense               | 2    | p.Gly12Ser         | c.34G>A         | 1552 | 287  | 18 % |
| NSCLC97  | chr2:42522656  | ALK    | NG_009445.1 | ALK Fusion |                        |      |                    |                 |      |      | -    |
|          | chr3:178936082 | PIK3CA | NM_006218.2 |            | missense               | 9    | p.Glu542Lys        | c.1624G>A       | 1994 | 136  | 7 %  |
| NSCLC98  | chr17:7578394  | TP53   | NM_000546.5 |            | missense               | 5    | p.His179Arg        | c.536A>G        | 1769 | 198  | 11 % |
| NSCLC99  | chr12:25398285 | KRAS   | NM_033360.3 |            | missense               | 2    | p.Gly12Cys         | c.34G>T         | 3659 | 509  | 14 % |
| NSCLC100 | chr17:7578457  | TP53   | NM_000546.5 |            | missense               | 5    | p.Arg158Leu        | c.473G>T        | 3835 | 2682 | 70 % |

CDS- Coding sequence nomenclature; Total Coverage- Total reads in the genomic region; Variant Coverage- Total variant reads; VAF- Variant allele frequency (%).

**Table S2.** Pathogenic variants detected in mCRC patients.

| Patient | Chr Position   | Gene   | NG/NM       | Mutation Type | Exon | Amino Acid Change   | CDS          | Total Coverage | Variant Coverage | VAF  |
|---------|----------------|--------|-------------|---------------|------|---------------------|--------------|----------------|------------------|------|
| CRC1    | chr17:7577547  | TP53   | NM_000546.5 | Missense      | 7    | p.Gly245Val         | c.734G>T     | 1686           | 166              | 10 % |
| CRC3    | chr12:25398284 | KRAS   | NM_033360.3 | Missense      | 2    | p.Gly12Asp          | c.35G>A      | 4777           | 1603             | 34 % |
|         | chr18:48591826 | SMAD4  | NM_005359.5 | Missense      | 9    | p.Glu330Gly         | c.989A>G     | 3709           | 1556             | 42 % |
| CRC4    | chr12:25398285 | KRAS   | NM_033360.3 | Missense      | 2    | p.Gly12Cys          | c.34G>T      | 2505           | 547              | 22 % |
|         | chr3:178936082 | PIK3CA | NM_006218.2 | Missense      | 9    | p.Gly542Lys         | c.1624 G>A   | 3142           | 705              | 22 % |
| CRC5    | chr12:25398285 | KRAS   | NM_033360.3 | Missense      | 2    | p.Gly12Cys          | c.34G>T      | 3997           | 1126             | 28 % |
|         | chr17:7578382  | TP53   | NM_000546.5 | Nonsense      | 5    | p.Ser183Ter         | c.548C>G     | 2085           | 993              | 48 % |
| CRC6    | chr17:7578392  | TP53   | NM_000546.5 | Deletion      | 5    | p. Arg174_His179del | c.520_537del | 1490           | 730              | 49 % |
|         | chr17:7578269  | TP53   | NM_000546.5 | Missense      | 6    | p.Leu194Phe         | c.580C>T     | 1846           | 49               | 3 %  |
| CRC7    | chr12:25398284 | KRAS   | NM_033360.3 | Missense      | 2    | p.Gly12Val          | c.35G>T      | 1544           | 236              | 15 % |
| CRC8    | chr12:25398284 | KRAS   | NM_033360.3 | Missense      | 2    | p.Gly12Asp          | c.35G>A      | 3994           | 1.358            | 34 % |
| CRC9    | chr12:25398284 | KRAS   | NM_033360.3 | Missense      | 2    | p.Gly12Asp          | c.35G>A      | 2733           | 1.613            | 59 % |
| CRC10   | chr3:178936082 | PIK3CA | NM_006218.2 | Missense      | 9    | p.Gly542Lys         | c.1624 G>A   | 3689           | 165              | 4 %  |
|         | chr17:7577120  | TP53   | NM_000546.5 | Missense      | 8    | p.Arg273His         | c.818G>A     | 1433           | 166              | 12 % |
| CRC11   | chr17:7578212  | TP53   | NM_000546.5 | Nonsense      | 6    | p.Arg213Ter         | c.637C>T     | 2045           | 382              | 19 % |
|         | chr12:25398285 | KRAS   | NM_033360.3 | Missense      | 2    | p.Gly12Cys          | c.34G>T      | 3997           | 1.126            | 28 % |
| CRC12   | chr3:178936082 | PIK3CA | NM_006218.2 | Missense      | 9    | p.Gly542Lys         | c.1624 G>A   | 2268           | 58               | 3 %  |
|         | chr17:7577121  | TP53   | NM_000546.5 | Missense      | 8    | p.Arg273Cys         | c.817C>T     | 2150           | 163              | 8 %  |
| CRC13   | chr12:25398284 | KRAS   | NM_033360.3 | Missense      | 2    | p.Gly12Ala          | c.35G>C      | 2938           | 762              | 26 % |
|         | chr17:7578395  | TP53   | NM_000546.5 | Missense      | 5    | p.His179Tyr         | c.535C>T     | 2444           | 1.040            | 43 % |
| CRC14   | chr12:25398284 | KRAS   | NM_033360.3 | Missense      | 2    | p.Gly12Val          | c.35G>T      | 2870           | 207              | 7 %  |
|         | chr3:178952090 | PIK3CA | NM_006218.2 | Missense      | 20   | p.His1049Arg        | c.3145G>C    | 3123           | 226              | 7 %  |
| CRC15   | chr17:7578406  | TP53   | NM_000546.5 | Missense      | 5    | p.Arg175His         | c.524G>A     | 2765           | 144              | 5 %  |
|         | chr1:115256529 | NRAS   | NM_002524.4 | Missense      | 3    | p.Gln61Arg          | c.182A>G     | 1773           | 105              | 6 %  |
| CRC16   | chr3:178936082 | PIK3CA | NM_006218.2 | Missense      | 9    | p.Gly542Lys         | c.1624 G>A   | 1847           | 107              | 6 %  |
| CRC18   | chr7:140453136 | BRAF   | NM_004333.4 | Missense      | 15   | p.Val600Glu         | c.1799T>A    | 2154           | 356              | 17 % |
| CRC19   | chr12:25378647 | KRAS   | NM_033360.3 | Missense      | 4    | p.Lys117Asn         | c.351A>T     | 3897           | 1.888            | 48 % |
| CRC20   | chr17:7577538  | TP53   | NM_000546.5 | Missense      | 7    | p.Arg248Gln         | c.743G>A     | 3984           | 330              | 8 %  |
|         | chr12:25398284 | KRAS   | NM_033360.3 | Missense      | 2    | p.Gly12Asp          | c.35G>A      | 3993           | 710              | 18 % |
| CRC21   | chr3:178936082 | PIK3CA | NM_006218.2 | Missense      | 9    | p.Gly542Lys         | c.1624 G>A   | 3930           | 100              | 3 %  |
|         | chr17:7577538  | TP53   | NM_000546.5 | Missense      | 7    | p.Arg248Gln         | c.743G>A     | 3974           | 923              | 23 % |
| CRC22   | chr7:140453136 | BRAF   | NM_004333.4 | Missense      | 15   | p.Val600Glu         | c.1799T>A    | 3987           | 1.237            | 31 % |
|         | chr17:7577022  | TP53   | NM_000546.5 | Nonsense      | 8    | p.Arg306Ter         | c.916C>T     | 1148           | 515              | 45 % |
| CRC23   | chr3:178936095 | PIK3CA | NM_006218.2 | Missense      | 9    | p.Gln546Arg         | c.1637A>G    | 3410           | 310              | 9 %  |
|         | chr18:48603032 | SMAD4  | NM_005359.5 | Nonsense      | 11   | p.Arg445Ter         | c.1333C>T    | 2530           | 169              | 7 %  |
| CRC24   | chr17:7578403  | TP53   | NM_000546.5 | Missense      | 5    | p.Cys176Tyr         | c.527G>A     | 553            | 110              | 20 % |
|         | chr3:178952085 | PIK3CA | NM_006218.2 | Missense      | 20   | p.His1047Arg        | c.3140A>G    | 1384           | 286              | 21 % |
| CRC25   | chr17:7577539  | TP53   | NM_000546.5 | Missense      | 7    | p.Arg248Trp         | c.742C>T     | 1811           | 260              | 14 % |
|         | chr7:140453136 | BRAF   | NM_004333.4 | Missense      | 15   | p.Val600Glu         | c.1799T>A    | 2192           | 314              | 14 % |
| CRC26   | chr4:153249348 | FBXW7  | NM_033632.3 | Missense      | 8    | p.Arg465His         | c.1394G>A    | 3283           | 765              | 23 % |

|       |                 |        |                 |          |    |              |                   |      |       |      |
|-------|-----------------|--------|-----------------|----------|----|--------------|-------------------|------|-------|------|
|       | chr17:7577547   | TP53   | NM_000546.5     | Missense | 7  | p.Gly245Asp  | c.734G>A          | 1304 | 252   | 19 % |
|       | chr12:25398285  | KRAS   | NM_033360.3     | Missense | 2  | p.Gly12Ser   | c.34G>A           | 3997 | 1.822 | 46 % |
| CRC27 | chr3:178936082  | PIK3CA | NM_006218.2     | Missense | 9  | p.Gly542Lys  | c.1624 G>A        | 3934 | 334   | 8 %  |
|       | chr17:7577551   | TP53   | NM_000546.5     | Missense | 7  | p.Gly244Ser  | c.730G>A          | 4000 | 1.632 | 41 % |
| CRC28 | chr17:7577559   | TP53   | NM_000546.5     | Missense | 7  | p.Ser241Phe  | c.722C>T          | 2123 | 587   | 28 % |
|       | chr12:25398284  | KRAS   | NM_033360.3     | Missense | 2  | p.Gly12Val   | c.35G>T           | 3486 | 346   | 10 % |
| CRC30 | chr17:7577094   | TP53   | NM_000546.5     | Missense | 8  | p.Arg282Trp  | c.844C>T          | 580  | 220   | 38 % |
|       | chr12:25378562  | KRAS   | NM_033360.3     | Missense | 4  | p.Ala146Thr  | c.436G>A          | 4000 | 1.003 | 25 % |
| CRC31 | chr12:25398262  | KRAS   | NM_033360.3     | Missense | 2  | p.Leu19Phe   | c.57G>T           | 3175 | 683   | 22 % |
|       | chr12:25398284  | KRAS   | NM_033360.3     | Missense | 2  | p.Gly12Asp   | c.35G>A           | 2595 | 994   | 38 % |
| CRC32 | chr3:178936091  | PIK3CA | NM_006218.2     | Missense | 9  | p.Glu545Lys  | c.1633G>A         | 2186 | 514   | 24 % |
|       | chr17:7578388   | TP53   | NM_000546.5     | Missense | 5  | p.Arg181His  | c.542G>A          | 1668 | 541   | 32 % |
|       | chr17:7578461   | TP53   | NM_000546.5     | Missense | 5  | p.Val157Leu  | c.469G>C          | 1665 | 1.038 | 62 % |
| CRC33 | chr12:25398282  | KRAS   | NM_033360.3     | Missense | 2  | p.Gly13Cys   | c.37G>T           | 3997 | 1.037 | 26 % |
| CRC34 | chr17:7577022   | TP53   | NM_000546.5     | Nonsense | 8  | p.Arg306Ter  | c.916C>T          | 926  | 279   | 30 % |
| CRC35 | chr17:7577120   | TP53   | NM_000546.5     | Missense | 8  | p.Arg273His  | c.818G>A          | 520  | 260   | 50 % |
| CRC36 | chr17:7577538   | TP53   | NM_000546.5     | Missense | 7  | p.Arg248Gln  | c.743G>A          | 1240 | 567   | 45 % |
|       | chr12:25378561  | KRAS   | NM_033360.3     | Missense | 4  | p.Ala146Val  | c.437C>T          | 3100 | 352   | 11 % |
| CRC38 | chr17:7577538   | TP53   | NM_000546.5     | Missense | 7  | p.Arg248Gln  | c.743G>A          | 1387 | 201   | 14 % |
|       | chr12:25398284  | KRAS   | NM_033360.3     | Missense | 2  | p.Gly12Val   | c.35G>T           | 3088 | 429   | 14 % |
| CRC39 | chr3:178936082  | PIK3CA | NM_006218.2     | Missense | 9  | p.Gly542Lys  | c.1624 G>A        | 3759 | 218   | 6 %  |
|       | chr7:140453148  | BRAF   | NM_004333.4     | Missense | 15 | p.Gly596Val  | c.1787G>T         | 3915 | 647   | 17 % |
| CRC40 | chr12:25398284  | KRAS   | NM_033360.3     | Missense | 2  | p.Gly12Asp   | c.35G>A           | 3979 | 606   | 15 % |
|       | chr17:7578406   | TP53   | NM_000546.5     | Missense | 5  | p.Arg175His  | c.524G>A          | 820  | 220   | 27 % |
| CRC41 | chr12:25398284  | KRAS   | NM_033360.3     | Missense | 2  | p.Gly12Asp   | c.35G>A           | 3309 | 756   | 23 % |
|       | chr4:153249348  | FBXW7  | NM_033632.3     | Missense | 8  | p.Arg465His  | c.1394G>A         | 2213 | 624   | 28 % |
| CRC42 | chr12:25398285  | KRAS   | NM_033360.3     | Missense | 2  | p.Gly12Ser   | c.34G>A           | 2981 | 246   | 8 %  |
|       | chr12:25398284  | KRAS   | NM_033360.3     | Missense | 2  | p.Gly12Val   | c.35G>T           | 3972 | 1.210 | 30 % |
| CRC43 | chr18:48591892  | SMAD4  | NM_005359.5     | Missense | 9  | p.Gly352Val  | c.1055G>T         | 3997 | 377   | 9 %  |
|       | chr12:25398285  | KRAS   | NM_033360.3     | Missense | 2  | p.Gly12Ser   | c.34G>A           | 5555 | 2.817 | 51 % |
| CRC44 | chr3:178936082  | PIK3CA | NM_006218.2     | Missense | 9  | p.Gly542Lys  | c.1624 G>A        | 3813 | 790   | 21 % |
| CRC45 | chr17:7577081   | TP53   | NM_000546.5     | Missense | 8  | p.Glu286Gly  | c.857A>G          | 1722 | 843   | 49 % |
|       | chr14:105246551 | AKT    | NM_0001014431.1 | Missense | 4  | p.Glu17Lys   | c.49G>A           | 700  | 21    | 3 %  |
| CRC46 | chr12:25399291  | KRAS   | NM_033360.3     | Missense | 2  | p.Gly13Asp   | c.38G>A           | 4000 | 243   | 6 %  |
|       | chr12:25398284  | KRAS   | NM_033360.3     | Missense | 2  | p.Gly12Asp   | c.35G>A           | 5059 | 476   | 9 %  |
| CRC47 | chr3:178936095  | PIK3CA | NM_006218.2     | Missense | 9  | p.Gln546Arg  | c.1637A>G         | 4078 | 623   | 15 % |
|       | chr18:48591918  | SMAD4  | NM_005359.5     | Missense | 9  | p.Arg361Cys  | c.1081C>T         | 3348 | 551   | 16 % |
| CRC49 | chr12:25398284  | KRAS   | NM_033360.3     | Missense | 2  | p.Gly12Asp   | c.35G>A           | 2185 | 1.198 | 55 % |
|       | chr12:25398284  | KRAS   | NM_033360.3     | Missense | 2  | p.Gly12Phe   | c.34_35delGGinsTT | 3707 | 1.380 | 37 % |
| CRC51 | chr7:116411923  | MET    | NM_001127500.1  | Missense | 14 | p.Arg988Cys  | c.2962C>T         | 2473 | 893   | 36 % |
|       | chr17:7578406   | TP53   | NM_000546.5     | Missense | 5  | p.Arg175His  | c.524G>A          | 2473 | 893   | 36 % |
| CRC53 | chr12:25398284  | KRAS   | NM_033360.3     | Missense | 2  | p.Gly12Val   | c.35G>T           | 3972 | 1.210 | 30 % |
|       | chr3:178952085  | PIK3CA | NM_006218.2     | Missense | 20 | p.His1047Arg | c.3140A>G         | 3270 | 1.921 | 59 % |
| CRC54 | chr12:25398284  | KRAS   | NM_033360.3     | Missense | 2  | p.Gly12Asp   | c.35G>A           | 4000 | 1.985 | 50 % |
|       | chr17:7577539   | TP53   | NM_000546.5     | Missense | 7  | p.Arg248Trp  | c.742C>T          | 1219 | 352   | 29 % |
| CRC55 | chr12:25398284  | KRAS   | NM_033360.3     | Missense | 2  | p.Gly12Asp   | c.35G>A           | 2713 | 447   | 16 % |

|       |                |               |             |          |    |             |           |       |       |      |
|-------|----------------|---------------|-------------|----------|----|-------------|-----------|-------|-------|------|
| CRC57 | chr3:178936091 | <i>PIK3CA</i> | NM_006218.2 | Missense | 9  | p.Glu545Lys | c.1633G>A | 3519  | 557   | 16 % |
|       | chr17:7577094  | <i>TP53</i>   | NM_000546.5 | Missense | 8  | p.Arg282Trp | c.844C>T  | 2827  | 2,227 | 79 % |
| CRC58 | chr4:153249446 | <i>FBXW7</i>  | NM_033632.3 | Missense | 11 | p.Ser582Leu | c.1745C>T | 6903  | 1,631 | 24 % |
|       | chr12:25378562 | <i>KRAS</i>   | NM_033360.3 | Missense | 4  | p.Ala146Val | c.437C>T  | 3503  | 1,575 | 45 % |
| CRC59 | chr17:7578263  | <i>TP53</i>   | NM_000546.5 | Nonsense | 6  | p.Arg196Ter | c.586C>T  | 2290  | 771   | 34 % |
|       | chr17:7577538  | <i>TP53</i>   | NM_000546.5 | Missense | 7  | p.Arg248Gln | c.743G>A  | 2905  | 652   | 22 % |
| CRC60 | chr4:153249348 | <i>FBXW7</i>  | NM_033632.3 | Missense | 8  | p.Arg465His | c.1394G>A | 4444  | 1,148 | 26 % |
|       | chr12:25398284 | <i>KRAS</i>   | NM_033360.3 | Missense | 2  | p.Gly12Val  | c.35G>T   | 5064  | 1,715 | 34 % |
|       | chr18:48591918 | <i>SMAD4</i>  | NM_005359.5 | Missense | 9  | p.Arg361Cys | c.1081C>T | 5582  | 313   | 6 %  |
| CRC61 | chr17:7578406  | <i>TP53</i>   | NM_000546.5 | Missense | 5  | p.Arg175His | c.524G>A  | 2198  | 1,071 | 49 % |
|       | chr3:41266136  | <i>CTNNB1</i> | NM_001904.3 | Missense | 3  | p.Ser45Pro  | c.133T>C  | 1961  | 812   | 41 % |
|       | chr12:25378562 | <i>KRAS</i>   | NM_033360.3 | Missense | 4  | p.Ala146Thr | c.436G>A  | 3232  | 653   | 20 % |
|       | chr10:89717769 | <i>PTEN</i>   | NM_000314.4 | Deletion | 7  | p.Lys267fs  | c.795del  | 3202  | 917   | 29 % |
| CRC62 | chr10:89720852 | <i>PTEN</i>   | NM_000314.4 | Missense | 8  | p.Arg335Ter | c.1003C>T | 1932  | 505   | 26 % |
|       | chr12:25398284 | <i>KRAS</i>   | NM_033360.3 | Missense | 2  | p.Gly12Asp  | c.35G>A   | 6260  | 908   | 15 % |
| CRC63 | chr17:7578406  | <i>TP53</i>   | NM_000546.5 | Missense | 5  | p.Arg175His | c.524G>A  | 2317  | 710   | 31 % |
| CRC64 | chr12:25398284 | <i>KRAS</i>   | NM_033360.3 | Missense | 2  | p.Gly12Val  | c.35G>T   | 7456  | 2,076 | 28 % |
| CRC65 | chr12:25398284 | <i>KRAS</i>   | NM_033360.3 | Missense | 2  | p.Gly12Asp  | c.35G>A   | 8743  | 3,635 | 42 % |
|       | chr17:7577509  | <i>TP53</i>   | NM_000546.5 | Missense | 7  | p.Glu258Lys | c.772G>A  | 2227  | 1,475 | 66 % |
| CRC67 | chr12:25399291 | <i>KRAS</i>   | NM_033360.3 | Missense | 2  | p.Gly13Asp  | c.38G>A   | 1043  | 120   | 12 % |
| CRC68 | chr17:7578550  | <i>TP53</i>   | NM_000546.5 | Missense | 5  | p.Ser127Phe | c.380C>T  | 893   | 444   | 50 % |
| CRC69 | chr17:7577120  | <i>TP53</i>   | NM_000546.5 | Missense | 8  | p.Arg273His | c.818G>A  | 512   | 236   | 46 % |
| CRC70 | chr12:25398284 | <i>KRAS</i>   | NM_033360.3 | Missense | 2  | p.Gly12Asp  | c.35G>A   | 4342  | 1,861 | 43 % |
|       | chr18:48591918 | <i>SMAD4</i>  | NM_005359.5 | Missense | 9  | p.Arg361Cys | c.1081C>T | 2151  | 455   | 21 % |
| CRC71 | chr17:7574018  | <i>TP53</i>   | NM_000546.5 | Missense | 10 | p.Arg337Cys | c.1009C>T | 503   | 65    | 13 % |
|       | chr17:7578437  | <i>TP53</i>   | NM_000546.5 | Nonsense | 5  | p.Gln165Ter | c.493C>T  | 503   | 65    | 13 % |
| CRC72 | chr12:25378561 | <i>KRAS</i>   | NM_033360.3 | Missense | 4  | p.Ala146Val | c.437C>T  | 3852  | 1,551 | 40 % |
|       | chr17:7578406  | <i>TP53</i>   | NM_000546.5 | Missense | 5  | p.Arg175His | c.524G>A  | 900   | 219   | 24 % |
| CRC73 | chr7:140453136 | <i>BRAF</i>   | NM_004333.4 | Missense | 15 | p.Val600Glu | c.1799T>A | 1926  | 572   | 30 % |
|       | chr10:89711907 | <i>PTEN</i>   | NM_000314.4 | Missense | 6  | p.Tyr177His | c.529T>C  | 1756  | 556   | 32 % |
| CRC75 | chr12:25398284 | <i>KRAS</i>   | NM_033360.3 | Missense | 2  | p.Gly12Asp  | c.35G>A   | 3670  | 1,084 | 30 % |
|       | chr17:577548   | <i>TP53</i>   | NM_000546.5 | Missense | 7  | p.Gly245Ser | c.733G>A  | 3999  | 523   | 13 % |
| CRC76 | chr7:140453136 | <i>BRAF</i>   | NM_004333.4 | Missense | 15 | p.Val600Glu | c.1799T>A | 2207  | 619   | 28 % |
|       | chr17:7577580  | <i>TP53</i>   | NM_000546.5 | Missense | 7  | p.Tyr234Cys | c.701A>G  | 3916  | 1,013 | 26 % |
|       | chr17:7578388  | <i>TP53</i>   | NM_000546.5 | Missense | 5  | p.Arg181Pro | c.542G>C  | 2798  | 493   | 18 % |
| CRC79 | chr3:41266137  | <i>CTNNB1</i> | NM_001904.3 | Missense | 3  | p.Ser45Phe  | c.134C>T  | 2738  | 1,684 | 62 % |
|       | chr12:25399291 | <i>KRAS</i>   | NM_033360.3 | Missense | 2  | p.Gly13Asp  | c.38G>A   | 5040  | 1,716 | 34 % |
| CRC80 | chr18:48591918 | <i>SMAD4</i>  | NM_005359.5 | Missense | 9  | p.Arg361His | c.1082G>A | 5362  | 1,763 | 33 % |
|       | chr17:7577538  | <i>TP53</i>   | NM_000546.5 | Missense | 7  | p.Arg248Gln | c.743G>A  | 10196 | 3,395 | 33 % |
| CRC81 | chr12:25398284 | <i>KRAS</i>   | NM_033360.3 | Missense | 2  | p.Gly12Asp  | c.35G>A   | 3843  | 656   | 17 % |
|       | chr18:48591901 | <i>SMAD4</i>  | NM_005359.5 | Missense | 9  | p.Asp355Val | c.1064A>T | 2709  | 266   | 10 % |
|       | chr17:7578212  | <i>TP53</i>   | NM_000546.5 | Nonsense | 6  | p.Arg213Ter | c.637C>T  | 2974  | 272   | 9 %  |
| CRC84 | chr7:140453132 | <i>BRAF</i>   | NM_004333.4 | Missense | 15 | p.Lys601Asn | c.1803A>C | 1289  | 161   | 12 % |
|       | chr1:115256529 | <i>NRAS</i>   | NM_002524.4 | Missense | 3  | p.Gln61Arg  | c.182A>G  | 2955  | 327   | 11 % |
| CRC82 | chr17:7577124  | <i>TP53</i>   | NM_000546.5 | Missense | 8  | p.Val272Leu | c.814G>T  | 1156  | 147   | 13 % |
|       | chr12:25398284 | <i>KRAS</i>   | NM_033360.3 | Missense | 2  | p.Gly12Asp  | c.35G>A   | 2514  | 1,051 | 42 % |

|        |                |               |             |            |    |              |            |      |       |      |
|--------|----------------|---------------|-------------|------------|----|--------------|------------|------|-------|------|
| CRC85  | chr7:140453136 | <i>BRAF</i>   | NM_004333.4 | Missense   | 15 | p.Val600Glu  | c.1799T>A  | 2078 | 291   | 14 % |
|        | chr3:178936082 | <i>PIK3CA</i> | NM_006218.2 | Missense   | 9  | p.Gly542Lys  | c.1624 G>A | 3964 | 849   | 21 % |
| CRC86  | chr15:66727455 | <i>MAP2K1</i> | NM_002755.3 | Missense   | 2  | p.Lys57Asn   | c.171G>C   | 1408 | 169   | 12 % |
|        | chr18:48591918 | <i>SMAD4</i>  | NM_005359.5 | Missense   | 9  | p.Arg361His  | c.1082G>A  | 3722 | 599   | 16 % |
| CRC87  | chr12:25399291 | <i>KRAS</i>   | NM_033360.3 | Missense   | 2  | p.Gly13Asp   | c.38G>A    | 4564 | 500   | 11 % |
|        | chr17:7577094  | <i>TP53</i>   | NM_000546.5 | Missense   | 8  | p.Arg282Trp  | c.844C>T   | 876  | 134   | 15 % |
| CRC88  | chr4:153258983 | <i>FBXW7</i>  | NM_033632.3 | Nonsense   | 4  | p.Arg278Ter  | c.832C>T   | 5498 | 547   | 10 % |
|        | chr12:25398285 | <i>KRAS</i>   | NM_033360.3 | Missense   | 2  | p.Gly12Ser   | c.34G>A    | 6281 | 1.442 | 23 % |
|        | chr17:7577563  | <i>TP53</i>   | NM_000546.5 | Missense   | 7  | p.Asn239Ile  | c.716A>T   | 3477 | 557   | 16 % |
|        | chr17:7577563  | <i>TP53</i>   | NM_000546.5 | Missense   | 7  | p.Ser240Gly  | c.718A>G   | 3477 | 557   | 16 % |
| CRC89  | chr12:25398284 | <i>KRAS</i>   | NM_033360.3 | Missense   | 2  | p.Gly12Ser   | c.34G>A    | 8221 | 1.366 | 17 % |
| CRC90  | chr17:7578272  | <i>TP53</i>   | NM_000546.5 | Missense   | 6  | p.His193Tyr  | c.577C>T   | 1911 | 233   | 12 % |
| CRC91  | chr7:140453136 | <i>BRAF</i>   | NM_004333.4 | Missense   | 15 | p.Val600Glu  | c.1799T>A  | 3104 | 686   | 22 % |
|        | chr18:48591918 | <i>SMAD4</i>  | NM_005359.5 | Missense   | 9  | p.Arg361Cys  | c.1081C>T  | 2253 | 460   | 20 % |
| CRC92  | chr7:140453136 | <i>BRAF</i>   | NM_004333.4 | Missense   | 15 | p.Val600Glu  | c.1799T>A  | 2077 | 142   | 7 %  |
|        | chr17:7577120  | <i>TP53</i>   | NM_000546.5 | Missense   | 8  | p.Arg273His  | c.818G>A   | 2077 | 142   | 7 %  |
| CRC94  | chr17:7578529  | <i>TP53</i>   | NM_000546.5 | Missense   | 5  | p.Phe134Cys  | c.401T>G   | 3395 | 1.329 | 39 % |
| CRC95  | chr12:25398284 | <i>KRAS</i>   | NM_033360.3 | Missense   | 2  | p.Gly12Asp   | c.35G>A    | 1386 | 495   | 36 % |
|        | chr17:7577094  | <i>TP53</i>   | NM_000546.5 | Missense   | 8  | p.Arg282Trp  | c.844C>T   | 821  | 226   | 28 % |
| CRC97  | chr9:139399362 | <i>NOTCH</i>  | NM_017617.3 | Missense   | 26 | p.Arg1594Gln | c.4781G>A  | 560  | 252   | 45 % |
| CRC98  | chr17:7577140  | <i>TP53</i>   | NM_000546.5 | Frameshift | 8  | p.Gly266fs   | c.797delG  | 905  | 445   | 49 % |
| CRC99  | chr12:25398284 | <i>KRAS</i>   | NM_033360.3 | Missense   | 2  | p.Gly12Val   | c.35G>T    | 3984 | 1.423 | 36 % |
|        | chr17:7577094  | <i>TP53</i>   | NM_000546.5 | Missense   | 8  | p.Arg282Trp  | c.844C>T   | 1758 | 875   | 50 % |
| CRC100 | chr18:48591918 | <i>SMAD4</i>  | NM_005359.5 | Missense   | 9  | p.Arg361His  | c.1082G>A  | 2325 | 745   | 32 % |
|        | chr17:7578266  | <i>TP53</i>   | NM_000546.5 | Missense   | 6  | p.Ile195Phe  | c.583A>T   | 689  | 219   | 32 % |

CDS- Coding sequence nomenclature; Total Coverage- Total reads in the genomic region; Variant Coverage- Total variant reads; VAF- Variant allele frequency (%).

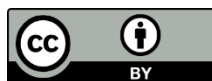

© 2019 by the authors. Licensee MDPI Basel Switzerland. This article is an open access article distributed under the terms and conditions of the Creative Commons Attribution (CC BY) license (<http://creativecommons.org/licenses/by/4.0/>).
